# Supplementary material
Source: MDPI journal article supplement (https://www.mdpi.com/2073-4441/15/18/3283)
Supplement: s1 [file s1]

# Multivariate drought risk analysis over Weihe River: Comparison between parametric and non-parametric copula methods

## Supplementary Materials

Fengping Liu <sup>1,2</sup>, Xu Wang <sup>1</sup>, Yuhu Chang <sup>2</sup>, Ye Xu <sup>1</sup>, Yinan Zheng <sup>2</sup>, Ning Sun <sup>2</sup> and Wei Li <sup>1,\*</sup>

<sup>1</sup> MOE Key Laboratory of Regional Energy and Environmental Systems Optimization, North China Electric Power University, Beijing 102206, China; liufp@caep.org.cn (F.L.); wangxu@ncepu.edu.cn (X.W.); xuye@ncepu.edu.cn (Y.X.)

<sup>2</sup> Chinese Academy of Environmental Planning, Beijing 100041, China; changyh@caep.org.cn (Y.C.); zhengyn@caep.org.cn (Y.Z.); tougao233@gmail.com (N.S.)

\* Correspondence: li.wei@ncepu.edu.cn

Table S1. The p-values of AD test for Gamma distribution for SPI

| Station ID | Jan   | Feb   | Mar   | Apr   | May   | Jun   | Jul   | Aug   | Sep   | Oct   | Nov   | Dec   |
|------------|-------|-------|-------|-------|-------|-------|-------|-------|-------|-------|-------|-------|
| 52986      | 0.426 | 0.451 | 0.804 | 0.897 | 0.961 | 0.999 | 0.972 | 0.937 | 0.983 | 0.999 | 0.858 | 0.219 |
| 52996      | 0.841 | 0.802 | 0.972 | 0.795 | 0.867 | 0.967 | 0.949 | 0.878 | 0.859 | 0.707 | 0.924 | 0.891 |
| 53738      | 0.026 | 0.912 | 0.957 | 0.974 | 0.981 | 0.986 | 0.964 | 0.853 | 0.778 | 0.949 | 0.524 | 0.000 |
| 53817      | 0.613 | 0.870 | 0.968 | 0.994 | 0.523 | 0.708 | 0.712 | 0.985 | 0.959 | 0.990 | 0.522 | 0.424 |
| 53821      | 0.358 | 0.442 | 0.968 | 0.686 | 0.949 | 0.972 | 0.957 | 0.998 | 0.937 | 0.971 | 0.354 | 0.003 |
| 53845      | 0.244 | 0.835 | 1.000 | 0.804 | 0.744 | 0.901 | 0.755 | 0.974 | 0.894 | 0.466 | 0.710 | 0.015 |
| 53903      | 0.847 | 0.621 | 0.978 | 0.824 | 0.652 | 0.995 | 0.994 | 0.953 | 0.911 | 0.988 | 0.374 | 0.219 |
| 53915      | 0.311 | 0.850 | 0.928 | 0.914 | 0.450 | 0.885 | 0.999 | 0.983 | 0.830 | 0.976 | 0.589 | 0.201 |
| 53923      | 0.386 | 0.700 | 0.955 | 0.549 | 0.979 | 0.876 | 0.999 | 0.927 | 0.993 | 0.806 | 0.603 | 0.367 |
| 53929      | 0.518 | 0.797 | 0.996 | 0.926 | 0.952 | 0.989 | 0.983 | 0.997 | 0.952 | 0.882 | 0.660 | 0.370 |
| 53942      | 0.493 | 0.527 | 0.910 | 0.990 | 0.971 | 0.984 | 0.601 | 0.905 | 0.850 | 0.528 | 0.512 | 0.086 |
| 56093      | 0.977 | 0.980 | 0.852 | 0.978 | 0.976 | 0.881 | 0.771 | 0.995 | 0.994 | 0.873 | 0.877 | 0.000 |
| 57034      | 0.258 | 0.485 | 0.981 | 0.982 | 0.996 | 0.980 | 0.905 | 0.880 | 0.987 | 0.783 | 0.970 | 0.003 |
| 57037      | 0.529 | 0.517 | 0.889 | 0.900 | 0.876 | 0.733 | 0.995 | 0.996 | 0.745 | 0.978 | 0.905 | 0.000 |
| 57046      | 0.749 | 0.970 | 0.673 | 0.841 | 0.993 | 0.986 | 0.999 | 0.911 | 0.996 | 0.965 | 0.967 | 0.880 |
| 57134      | 0.443 | 0.980 | 0.826 | 0.712 | 0.848 | 0.991 | 0.848 | 0.993 | 0.986 | 0.963 | 0.772 | 0.868 |
| 57144      | 0.471 | 0.880 | 0.899 | 0.902 | 0.999 | 0.666 | 0.936 | 0.995 | 0.999 | 0.994 | 0.983 | 0.165 |
| 57143      | 0.410 | 0.922 | 0.843 | 0.608 | 0.940 | 0.921 | 0.997 | 0.930 | 0.993 | 0.758 | 0.501 | 0.302 |

Table S2. The p-values of AD test for GEV distribution for SPEI

| Station ID | Jan   | Feb   | Mar   | Apr   | May   | Jun   | Jul   | Aug   | Sep   | Oct   | Nov   | Dec   |
|------------|-------|-------|-------|-------|-------|-------|-------|-------|-------|-------|-------|-------|
| 52986      | 0.984 | 0.827 | 0.911 | 0.909 | 0.978 | 0.998 | 0.950 | 0.892 | 0.953 | 0.998 | 0.975 | 0.928 |
| 52996      | 0.952 | 0.734 | 0.807 | 0.919 | 0.931 | 0.951 | 0.930 | 0.791 | 0.907 | 0.730 | 0.994 | 0.793 |
| 53738      | 0.960 | 0.981 | 0.487 | 0.935 | 0.831 | 0.928 | 0.908 | 0.863 | 0.983 | 0.994 | 0.943 | 0.733 |
| 53817      | 0.636 | 0.986 | 1.000 | 0.909 | 0.790 | 0.733 | 0.878 | 0.985 | 0.924 | 0.995 | 0.857 | 0.715 |
| 53821      | 0.796 | 0.928 | 0.909 | 0.945 | 0.948 | 0.971 | 0.974 | 0.998 | 0.924 | 0.999 | 0.958 | 0.950 |
| 53845      | 0.992 | 0.949 | 0.980 | 0.969 | 0.842 | 0.973 | 0.734 | 0.988 | 0.900 | 0.628 | 0.954 | 0.935 |
| 53903      | 0.991 | 0.940 | 0.971 | 0.872 | 0.941 | 0.864 | 0.979 | 0.953 | 0.993 | 0.990 | 0.997 | 0.998 |
| 53915      | 1.000 | 0.988 | 0.985 | 0.969 | 0.457 | 0.976 | 0.964 | 0.775 | 0.829 | 0.974 | 0.997 | 0.835 |
| 53923      | 0.999 | 0.654 | 0.966 | 0.806 | 0.999 | 0.918 | 0.961 | 0.946 | 0.995 | 0.942 | 0.983 | 0.977 |
| 53929      | 0.960 | 0.863 | 0.971 | 0.804 | 0.967 | 0.992 | 0.918 | 0.987 | 0.774 | 0.873 | 0.995 | 0.997 |
| 53942      | 0.975 | 0.980 | 0.978 | 0.995 | 0.988 | 0.851 | 0.684 | 0.978 | 0.701 | 0.746 | 0.948 | 1.000 |
| 56093      | 0.843 | 0.981 | 0.998 | 0.905 | 0.999 | 0.492 | 0.842 | 1.000 | 0.995 | 0.949 | 0.969 | 0.999 |
| 57034      | 0.998 | 0.998 | 0.942 | 0.982 | 0.982 | 0.849 | 0.695 | 0.989 | 0.908 | 0.952 | 0.972 | 0.912 |
| 57037      | 0.995 | 0.981 | 0.994 | 0.938 | 0.925 | 0.835 | 1.000 | 0.997 | 0.833 | 0.992 | 0.984 | 0.856 |
| 57046      | 0.929 | 0.988 | 0.964 | 0.902 | 0.991 | 0.923 | 0.999 | 0.931 | 0.990 | 0.954 | 0.984 | 0.996 |
| 57134      | 0.819 | 0.891 | 0.902 | 0.869 | 0.798 | 0.998 | 0.868 | 0.963 | 0.990 | 0.991 | 0.650 | 0.973 |
| 57144      | 0.996 | 0.982 | 0.976 | 0.961 | 0.740 | 0.781 | 0.882 | 0.987 | 0.999 | 0.974 | 0.950 | 0.919 |
| 57143      | 0.900 | 0.998 | 0.932 | 0.877 | 0.981 | 0.963 | 0.980 | 0.982 | 0.997 | 0.907 | 0.673 | 0.990 |

Table S3. Performances of the best parametric copula and nonparametric copula for 3-month SPI and SPEI at each station

| Station ID | Parametric copula |              |        |         | Nonparametric copula |        |         |
|------------|-------------------|--------------|--------|---------|----------------------|--------|---------|
|            | Option            | P-value (KS) | RMSE   | AIC     | P-value (KS)         | RMSE   | AIC     |
| 52986      | Joe               | 0.9880       | 0.0252 | -307.04 | 0.9891               | 0.0206 | -295.94 |
| 52996      | Gumbel            | 0.7443       | 0.0313 | -275.22 | 0.9042               | 0.0319 | -255.75 |
| 53738      | Joe               | 0.9999       | 0.0271 | -308.36 | 0.9999               | 0.0260 | -291.63 |
| 53817      | Joe               | 0.9886       | 0.0280 | -298.36 | 0.9204               | 0.0369 | -262.13 |
| 53821      | Gumbel            | 1.0000       | 0.0263 | -325.50 | 0.9383               | 0.0273 | -302.00 |
| 53845      | Gaussian          | 0.7998       | 0.0271 | -315.48 | 0.9308               | 0.0279 | -298.62 |
| 53903      | Gaussian          | 0.9896       | 0.0321 | -286.98 | 0.9892               | 0.0310 | -275.65 |
| 53915      | Gumbel            | 0.9885       | 0.0239 | -311.56 | 0.9893               | 0.0253 | -280.24 |
| 53923      | Gumbel            | 0.9999       | 0.0200 | -334.34 | 0.9999               | 0.0227 | -307.73 |
| 53929      | Gumbel            | 0.9924       | 0.0193 | -345.54 | 0.7982               | 0.0268 | -311.79 |
| 53942      | Gumbel            | 0.9931       | 0.0289 | -309.79 | 0.9327               | 0.0314 | -288.28 |
| 56093      | Gaussian          | 0.9999       | 0.0259 | -290.16 | 0.9998               | 0.0256 | -275.71 |
| 57034      | Gaussian          | 0.9916       | 0.0266 | -317.28 | 0.9921               | 0.0225 | -313.31 |
| 57037      | Gumbel            | 0.9917       | 0.0307 | -304.45 | 0.9929               | 0.0307 | -288.45 |
| 57046      | Gumbel            | 0.9316       | 0.0391 | -283.24 | 0.9317               | 0.0356 | -272.25 |
| 57134      | Joe               | 0.9424       | 0.0253 | -336.22 | 0.9937               | 0.0278 | -311.83 |
| 57144      | Gaussian          | 0.7806       | 0.0279 | -305.81 | 0.7832               | 0.0286 | -289.67 |
| 57143      | Frank             | 0.9943       | 0.0269 | -330.65 | 0.9940               | 0.0301 | -307.08 |
